# Supplementary material
Source: HighWire-hosted journal article supplement (https://bmjopen.bmj.com/content/7/2/e015915)
Supplement: inline-supplementary-material-4 [file inline-supplementary-material-4.pdf]

# CORONARY REVASCULARISATION OUTCOME QUESTIONNAIRE (CROQ-PTCA v2)

INSTRUCTIONS: We are interested in finding out how you have been since your heart operation. Please be sure to answer all questions.

1. During the past 4 weeks, how much were you bothered by each of the following problems related to your **heart condition**? (Please tick one box on each line.)

|                                                                                                            | A lot                    | Quite a bit              | Moderately               | A little                 | Not at all               |
|------------------------------------------------------------------------------------------------------------|--------------------------|--------------------------|--------------------------|--------------------------|--------------------------|
| Chest pain due to angina                                                                                   | <input type="checkbox"/> | <input type="checkbox"/> | <input type="checkbox"/> | <input type="checkbox"/> | <input type="checkbox"/> |
| Discomfort in your chest due to angina                                                                     | <input type="checkbox"/> | <input type="checkbox"/> | <input type="checkbox"/> | <input type="checkbox"/> | <input type="checkbox"/> |
| Shortness of breath                                                                                        | <input type="checkbox"/> | <input type="checkbox"/> | <input type="checkbox"/> | <input type="checkbox"/> | <input type="checkbox"/> |
| Angina pain that radiates to other parts of your body (eg arms, shoulders, hands, neck, throat, jaw, back) | <input type="checkbox"/> | <input type="checkbox"/> | <input type="checkbox"/> | <input type="checkbox"/> | <input type="checkbox"/> |
| Palpitations (strong or irregular heart beat)                                                              | <input type="checkbox"/> | <input type="checkbox"/> | <input type="checkbox"/> | <input type="checkbox"/> | <input type="checkbox"/> |

2. During the past 4 weeks, on average, how many times have you taken nitros (nitroglycerin tablets or spray) for your **chest pain, chest tightness or angina**? (Please tick only one box.)

|                          |                          |                                            |                          |                          |                            |
|--------------------------|--------------------------|--------------------------------------------|--------------------------|--------------------------|----------------------------|
| <input type="checkbox"/> | <input type="checkbox"/> | <input type="checkbox"/>                   | <input type="checkbox"/> | <input type="checkbox"/> | <input type="checkbox"/>   |
| 4 or more times per day  | 1-3 times per day        | 3 or more times per week but not every day | 1-2 times per week       | Less than once a week    | None over the past 4 weeks |

3. During the past 4 weeks, how much trouble has your **heart condition** caused you? (Please tick only one box.)

|                          |                          |                          |                          |                          |
|--------------------------|--------------------------|--------------------------|--------------------------|--------------------------|
| <input type="checkbox"/> | <input type="checkbox"/> | <input type="checkbox"/> | <input type="checkbox"/> | <input type="checkbox"/> |
| A lot                    | Quite a bit              | Some                     | A little                 | None                     |

4. The question asks about activities which you might do during a typical day. During the past 4 weeks, has your **heart condition** limited you in your usual daily activities? Please indicate whether your heart condition limits you a lot, limits you a little, or does not limit you at all in the activities listed below. (Please tick one box on each line.)

| <u>ACTIVITIES</u>                                                                                       | Yes,<br>limited a<br>lot | Yes,<br>limited a<br>little | No, not<br>limited at<br>all |
|---------------------------------------------------------------------------------------------------------|--------------------------|-----------------------------|------------------------------|
| <b>Moderate activities</b> , such as moving a table, pushing a vacuum cleaner, bowling, or playing golf | <input type="checkbox"/> | <input type="checkbox"/>    | <input type="checkbox"/>     |
| Lifting or carrying groceries                                                                           | <input type="checkbox"/> | <input type="checkbox"/>    | <input type="checkbox"/>     |
| Climbing <b>several</b> flights of stairs                                                               | <input type="checkbox"/> | <input type="checkbox"/>    | <input type="checkbox"/>     |
| Climbing <b>one</b> flight of stairs                                                                    | <input type="checkbox"/> | <input type="checkbox"/>    | <input type="checkbox"/>     |
| Bending, kneeling or stooping                                                                           | <input type="checkbox"/> | <input type="checkbox"/>    | <input type="checkbox"/>     |
| Walking <b>half a mile</b>                                                                              | <input type="checkbox"/> | <input type="checkbox"/>    | <input type="checkbox"/>     |
| Walking <b>one hundred yards</b>                                                                        | <input type="checkbox"/> | <input type="checkbox"/>    | <input type="checkbox"/>     |
| Bathing or dressing yourself                                                                            | <input type="checkbox"/> | <input type="checkbox"/>    | <input type="checkbox"/>     |

5. This question asks about the impact of your **heart condition** on your family and friends and the extent to which it has interfered with your social activities. During the past 4 weeks, how often have you experienced the following as a result of your **heart condition**:  
(Please tick one box on each line.)

|                                                                                            | All<br>of the<br>time    | Most<br>of the<br>time   | Some<br>of the<br>time   | A little<br>of the<br>time | None<br>of the<br>time   |
|--------------------------------------------------------------------------------------------|--------------------------|--------------------------|--------------------------|----------------------------|--------------------------|
| Family or friends being overprotective toward you?                                         | <input type="checkbox"/> | <input type="checkbox"/> | <input type="checkbox"/> | <input type="checkbox"/>   | <input type="checkbox"/> |
| Feeling like you are a burden on others?                                                   | <input type="checkbox"/> | <input type="checkbox"/> | <input type="checkbox"/> | <input type="checkbox"/>   | <input type="checkbox"/> |
| Feeling restricted in your social activities (like visiting with friends, relatives, etc)? | <input type="checkbox"/> | <input type="checkbox"/> | <input type="checkbox"/> | <input type="checkbox"/>   | <input type="checkbox"/> |
| Feeling worried about going too far from home?                                             | <input type="checkbox"/> | <input type="checkbox"/> | <input type="checkbox"/> | <input type="checkbox"/>   | <input type="checkbox"/> |

6. This question asks about your feelings about your **heart condition**. During the past 4 weeks, how often have you felt: (Please tick one box on each line.)

|                                                                          | All of the time          | Most of the time         | Some of the time         | A little of the time     | None of the time         |
|--------------------------------------------------------------------------|--------------------------|--------------------------|--------------------------|--------------------------|--------------------------|
| Worried about your heart condition?                                      | <input type="checkbox"/> | <input type="checkbox"/> | <input type="checkbox"/> | <input type="checkbox"/> | <input type="checkbox"/> |
| Worried about doing too much or over-doing it?                           | <input type="checkbox"/> | <input type="checkbox"/> | <input type="checkbox"/> | <input type="checkbox"/> | <input type="checkbox"/> |
| Worried that you might have a heart attack or die suddenly?              | <input type="checkbox"/> | <input type="checkbox"/> | <input type="checkbox"/> | <input type="checkbox"/> | <input type="checkbox"/> |
| Worried that your symptoms might return?                                 | <input type="checkbox"/> | <input type="checkbox"/> | <input type="checkbox"/> | <input type="checkbox"/> | <input type="checkbox"/> |
| Frightened by the pain or discomfort of your heart condition?            | <input type="checkbox"/> | <input type="checkbox"/> | <input type="checkbox"/> | <input type="checkbox"/> | <input type="checkbox"/> |
| Uncertain about the future?                                              | <input type="checkbox"/> | <input type="checkbox"/> | <input type="checkbox"/> | <input type="checkbox"/> | <input type="checkbox"/> |
| Depressed?                                                               | <input type="checkbox"/> | <input type="checkbox"/> | <input type="checkbox"/> | <input type="checkbox"/> | <input type="checkbox"/> |
| Frustrated or impatient?                                                 | <input type="checkbox"/> | <input type="checkbox"/> | <input type="checkbox"/> | <input type="checkbox"/> | <input type="checkbox"/> |
| That your heart condition interfered with your enjoyment of life?        | <input type="checkbox"/> | <input type="checkbox"/> | <input type="checkbox"/> | <input type="checkbox"/> | <input type="checkbox"/> |
| That it was difficult to keep a positive outlook about your health?      | <input type="checkbox"/> | <input type="checkbox"/> | <input type="checkbox"/> | <input type="checkbox"/> | <input type="checkbox"/> |
| That it was difficult to plan ahead (eg vacations, social events, etc.)? | <input type="checkbox"/> | <input type="checkbox"/> | <input type="checkbox"/> | <input type="checkbox"/> | <input type="checkbox"/> |

7. This question asks about problems related to your **heart condition**. During the past 4 weeks, how much of the time did you: (Please tick one box on each line.)

|                                                                                                                  | All of the time          | Most of the time         | A good bit of the time   | Some of the time         | A little of the time     | None of the time         |
|------------------------------------------------------------------------------------------------------------------|--------------------------|--------------------------|--------------------------|--------------------------|--------------------------|--------------------------|
| Have difficulty reasoning and solving problems, for example making plans, making decisions, learning new things? | <input type="checkbox"/> | <input type="checkbox"/> | <input type="checkbox"/> | <input type="checkbox"/> | <input type="checkbox"/> | <input type="checkbox"/> |
| Forget, for example things that happened recently, where you put things or appointments?                         | <input type="checkbox"/> | <input type="checkbox"/> | <input type="checkbox"/> | <input type="checkbox"/> | <input type="checkbox"/> | <input type="checkbox"/> |
| Have difficulty doing activities involving concentration and thinking?                                           | <input type="checkbox"/> | <input type="checkbox"/> | <input type="checkbox"/> | <input type="checkbox"/> | <input type="checkbox"/> | <input type="checkbox"/> |

8. This question asks about problems you might have had **since your heart operation**. During the past 4 weeks, how much were you bothered by the following problems? If you did not have the problem, tick the last box "Not at all". (Please tick one box on each line.)

|                                                                         | A lot                    | Quite a bit              | Moderately               | A little                 | Not at all               |
|-------------------------------------------------------------------------|--------------------------|--------------------------|--------------------------|--------------------------|--------------------------|
| Pain in your <b>groin or arm wound</b>                                  | <input type="checkbox"/> | <input type="checkbox"/> | <input type="checkbox"/> | <input type="checkbox"/> | <input type="checkbox"/> |
| Tenderness around your <b>groin or arm wound</b>                        | <input type="checkbox"/> | <input type="checkbox"/> | <input type="checkbox"/> | <input type="checkbox"/> | <input type="checkbox"/> |
| Numbness or tingling in your <b>groin area or around your arm wound</b> | <input type="checkbox"/> | <input type="checkbox"/> | <input type="checkbox"/> | <input type="checkbox"/> | <input type="checkbox"/> |
| Bruising around your <b>groin wound, thigh, or arm wound</b>            | <input type="checkbox"/> | <input type="checkbox"/> | <input type="checkbox"/> | <input type="checkbox"/> | <input type="checkbox"/> |
| Problems in your <b>groin or arm</b> where the catheter was inserted    | <input type="checkbox"/> | <input type="checkbox"/> | <input type="checkbox"/> | <input type="checkbox"/> | <input type="checkbox"/> |
| Concern over the appearance of your bruises                             | <input type="checkbox"/> | <input type="checkbox"/> | <input type="checkbox"/> | <input type="checkbox"/> | <input type="checkbox"/> |

9. This question asks about how satisfied you are with your **heart operation**. How satisfied are you with the: (Please tick one box on each line.)

|                                                                                                 | Very dissatisfied        | Somewhat dissatisfied    | Somewhat satisfied       | Very satisfied           |
|-------------------------------------------------------------------------------------------------|--------------------------|--------------------------|--------------------------|--------------------------|
| Results of your heart operation?                                                                | <input type="checkbox"/> | <input type="checkbox"/> | <input type="checkbox"/> | <input type="checkbox"/> |
| Information you were given about your heart operation?                                          | <input type="checkbox"/> | <input type="checkbox"/> | <input type="checkbox"/> | <input type="checkbox"/> |
| Information you were given about how you might feel while recovering from your heart operation? | <input type="checkbox"/> | <input type="checkbox"/> | <input type="checkbox"/> | <input type="checkbox"/> |

10. Overall, how would you describe your **heart condition** now compared to before you had your heart operation? (Please tick one box.)

|                          |                          |                          |                          |                          |
|--------------------------|--------------------------|--------------------------|--------------------------|--------------------------|
| <input type="checkbox"/> | <input type="checkbox"/> | <input type="checkbox"/> | <input type="checkbox"/> | <input type="checkbox"/> |
| Much worse               | A little worse           | About the same           | A little better          | Much better              |

**11.** Has your recovery from your **heart operation** so far been: (Please tick one box.)

Slower than you  
expected?

About what you  
expected?

Faster than you  
expected?

Did not know how  
long it would take?

**12** Are the results from your **heart operation**: (Please tick one box.)

Worse than you  
expected?

About what you  
expected?

Better than you  
expected?
