# Supplementary material
Source: HighWire-hosted journal article supplement (https://bmjopen.bmj.com/content/7/2/e015915)
Supplement: inline-supplementary-material-5 [file inline-supplementary-material-5.pdf]

**Web Table 1: Construct validity (comparison with external criteria) - hypothesis testing: Comparison of mean (SD) CROQ-CABG and CROQ-PCI Q1 scores for patients with problems versus no problems on the EQ-5D dimensions at Q1**

|                           | EQ-5D Mobility             |                            |       | EQ-5D Self Care            |                          |       | EQ-5D Usual Activities     |                            |       | EQ-5D Pain & Discomfort    |                            |       | EQ-5D Anxiety & Depression |                            |       |
|---------------------------|----------------------------|----------------------------|-------|----------------------------|--------------------------|-------|----------------------------|----------------------------|-------|----------------------------|----------------------------|-------|----------------------------|----------------------------|-------|
|                           | No problems                | Problems                   | p     | No problems                | Problems                 | p     | No problems                | Problems                   | p     | No problems                | Problems                   | p     | No problems                | Problems                   | p     |
| <b>CROQ-CABG (n=2685)</b> |                            |                            |       |                            |                          |       |                            |                            |       |                            |                            |       |                            |                            |       |
| Symptoms                  | 75.40<br>(20.2)<br>n=1,238 | 55.71<br>(23.2)<br>n=1,333 | <.001 | 67.48<br>(22.9)<br>n=2,297 | 46.52<br>(23.9)<br>n=276 | <.001 | 77.57<br>(19.5)<br>n=993   | 57.41<br>(23.1)<br>n=1,577 | <.001 | 81.86<br>(16.6)<br>n=1,003 | 54.46<br>(21.7)<br>n=1,558 | <.001 | 71.54<br>(21.6)<br>n=1,297 | 58.84<br>(24.4)<br>n=1,273 | <.001 |
| Physical Functioning      | 77.24<br>(21.5)<br>n=1,239 | 44.24<br>(24.7)<br>n=1,340 | <.001 | 64.07<br>(26.5)<br>n=2,304 | 26.48<br>(21.7)<br>n=277 | <.001 | 79.32<br>(21.0)<br>n=995   | 48.01<br>(25.7)<br>n=1,584 | <.001 | 75.92<br>(23.9)<br>n=1,007 | 49.79<br>(26.4)<br>n=1,562 | <.001 | 67.06<br>(26.9)<br>n=1,313 | 52.81<br>(28.2)<br>n=1,267 | <.001 |
| Psychosocial Functioning  | 71.01<br>(20.4)<br>n=1,248 | 51.45<br>(23.7)<br>n=1,355 | <.001 | 63.36<br>(23.1)<br>n=2,325 | 39.84<br>(23.5)<br>n=281 | <.001 | 75.64<br>(18.5)<br>n=1,008 | 51.50<br>(22.7)<br>n=1,595 | <.001 | 73.66<br>(19.1)<br>n=1,017 | 52.6<br>(23.6)<br>n=1,576  | <.001 | 73.78<br>(18.4)<br>n=1,325 | 47.51<br>(22.2)<br>n=1,279 | <.001 |
| Cognitive Functioning     | 84.49<br>(20.0)<br>n=1,246 | 67.60<br>(28.9)<br>n=1,358 | <.001 | 78.39<br>(24.6)<br>n=2,325 | 52.92<br>(30.1)<br>n=282 | <.001 | 87.22<br>(18.5)<br>n=1,007 | 68.41<br>(28.0)<br>n=1,597 | <.001 | 86.23<br>(19.5)<br>n=1,015 | 68.89<br>(28.0)<br>n=1,579 | <.001 | 86.39<br>(18.8)<br>n=1,327 | 64.51<br>(28.5)<br>n=1,278 | <.001 |
| <b>CROQ-PCI (n=3711)</b>  |                            |                            |       |                            |                          |       |                            |                            |       |                            |                            |       |                            |                            |       |
| Symptoms                  | 73.63<br>(20.9)<br>n=1,590 | 50.50<br>(23.5)<br>n=1,947 | <.001 | 64.21<br>(24.1)<br>n=2,982 | 43.14<br>(23.6)<br>n=560 | <.001 | 76.33<br>(19.9)<br>n=1,248 | 52.43<br>(23.8)<br>n=2,289 | <.001 | 81.66<br>(16.8)<br>n=1,050 | 51.95<br>(22.9)<br>n=2,484 | <.001 | 68.55<br>(23.2)<br>n=1,704 | 53.74<br>(24.9)<br>n=1,829 | <.001 |
| Physical Functioning      | 77.82<br>(21.3)<br>n=1,609 | 40.36<br>(25.6)<br>n=1,942 | <.001 | 63.54<br>(27.3)<br>n=2,998 | 24.31<br>(22.8)<br>n=560 | <.001 | 79.79<br>(21.1)<br>n=1,258 | 45.11<br>(27.2)<br>n=2,295 | <.001 | 77.54<br>(24.4)<br>n=1,073 | 48.50<br>(28.2)<br>n=2,475 | <.001 | 66.18<br>(28.4)<br>n=1,718 | 49.08<br>(29.5)<br>n=1,829 | <.001 |
| Psychosocial Functioning  | 73.31<br>(19.9)<br>n=1,623 | 49.22<br>(24.0)<br>n=1,961 | <.001 | 64.75<br>(23.1)<br>n=3,023 | 35.55<br>(21.9)<br>n=565 | <.001 | 78.18<br>(18.2)<br>n=1,269 | 50.24<br>(23.0)<br>n=2,315 | <.001 | 75.48<br>(19.3)<br>n=1,083 | 53.41<br>(24.6)<br>n=2,497 | <.001 | 74.00<br>(19.3)<br>n=1,736 | 47.05<br>(23.2)<br>n=1,845 | <.001 |
| Cognitive Functioning     | 84.70<br>(20.0)<br>n=1,622 | 64.82<br>(29.5)<br>n=1,964 | <.001 | 78.64<br>(24.0)<br>n=3,023 | 48.20<br>(30.3)<br>n=568 | <.001 | 88.16<br>(17.6)<br>n=1,271 | 66.00<br>(28.7)<br>n=2,314 | <.001 | 86.98<br>(18.7)<br>n=1,088 | 68.04<br>(28.7)<br>n=2,496 | <.001 | 86.48<br>(18.8)<br>n=1,738 | 61.83<br>(29.0)<br>n=1,844 | <.001 |

Note: higher scores on CROQv2 indicate better functioning.
