# Supplementary material
Source: HighWire-hosted journal article supplement (https://bmjopen.bmj.com/content/7/2/e015915)
Supplement: inline-supplementary-material-6 [file inline-supplementary-material-6.pdf]

**Web Table 2 : Construct validity (comparison with external criteria) - hypothesis testing: Comparison of mean (SD) CROQ-CABG and CROQ-PCI Q1 scores for patients with problems versus no problems on the EQ-5D dimensions at Q2**

|                          | EQ-5D Mobility           |                           |       | EQ-5D Self Care          |                         |       | EQ-5D Usual Activities   |                          |       | EQ-5D Pain & Discomfort   |                          |       | EQ-5D Anxiety & Depression |                          |       |
|--------------------------|--------------------------|---------------------------|-------|--------------------------|-------------------------|-------|--------------------------|--------------------------|-------|---------------------------|--------------------------|-------|----------------------------|--------------------------|-------|
|                          | No problems              | Problems                  | p     | No problems              | Problems                | p     | No problems              | Problems                 | p     | No problems               | Problems                 | p     | No problems                | Problems                 | p     |
| CROQ-CABG (n=869)        |                          |                           |       |                          |                         |       |                          |                          |       |                           |                          |       |                            |                          |       |
| Symptoms                 | 93.77<br>(10.5)<br>n=590 | 79.45<br>(20.0)<br>n=252  | <.001 | 91.37<br>(13.3)<br>n=757 | 72.11<br>(22.5)<br>n=81 | <.001 | 94.78<br>(8.9)<br>n=573  | 78.03<br>(20.0)<br>n=266 | <.001 | 95.84<br>(7.0)<br>n=477   | 81.08<br>(19.3)<br>n=361 | <.001 | 93.67<br>(10.5)<br>n=593   | 79.36<br>(20.3)<br>n=245 | <.001 |
| Physical Functioning     | 91.97<br>(13.3)<br>n=593 | 58.07<br>(28.01)<br>n=251 | <.001 | 86.42<br>(19.5)<br>n=760 | 40.24<br>(26.5)<br>n=81 | <.001 | 92.78<br>(11.8)<br>n=576 | 58.50<br>(27.9)<br>n=266 | <.001 | 92.08<br>(14.6)<br>n=477  | 68.45<br>(28.1)<br>n=364 | <.001 | 88.69<br>(18.0)<br>n=594   | 65.44<br>(29.8)<br>n=247 | <.001 |
| Psychosocial Functioning | 89.37<br>(13.2)<br>n=599 | 67.06<br>(25.5)<br>n=258  | <.001 | 86.10<br>(16.5)<br>n=770 | 51.75<br>(26.7)<br>n=83 | <.001 | 91.21<br>(11.2)<br>n=583 | 64.36<br>(23.8)<br>n=271 | <.001 | 91.63<br>(10.6)<br>n=484  | 70.92<br>(24.1)<br>n=367 | <.001 | 91.01<br>(11.2)<br>n=606   | 62.28<br>(23.7)<br>n=247 | <.001 |
| Cognitive Functioning    | 89.93<br>(14.8)<br>n=599 | 70.79<br>(28.2)<br>n=257  | <.001 | 87.53<br>(17.5)<br>n=769 | 53.73<br>(30.9)<br>n=83 | <.001 | 91.36<br>(13.3)<br>n=583 | 68.7<br>(27.4)<br>n=270  | <.001 | 91.86<br>(13.07)<br>n=484 | 74.23<br>(26.1)<br>n=366 | <.001 | 91.13<br>(14.2)<br>n=606   | 67.05<br>(26.8)<br>n=246 | <.001 |
| Adverse Effects          | 90.44<br>(10.2)<br>n=599 | 79.62<br>(19.3)<br>n=257  | <.001 | 89.07<br>(11.6)<br>n=769 | 70.58<br>(24.6)<br>n=83 | <.001 | 91.40<br>(9.0)<br>n=583  | 78.19<br>(19.3)<br>n=270 | <.001 | 93.67<br>(6.5)<br>n=485   | 78.71<br>(17.5)<br>n=365 | <.001 | 90.71<br>(10.1)<br>n=606   | 78.58<br>(19.3)<br>n=246 | <.001 |
| Satisfaction             | 87.78<br>(14.9)<br>n=602 | 75.09<br>(21.0)<br>n=258  | <.001 | 85.43<br>(16.8)<br>n=773 | 70.75<br>(21.4)<br>n=83 | <.001 | 89.73<br>(12.7)<br>n=586 | 71.39<br>(20.9)<br>n=271 | <.001 | 90.49<br>(12.4)<br>n=486  | 75.17<br>(20.3)<br>n=368 | <.001 | 88.72<br>(13.8)<br>n=608   | 72.25<br>(21.0)<br>n=248 | <.001 |
| CROQ-PCI (n=837)         |                          |                           |       |                          |                         |       |                          |                          |       |                           |                          |       |                            |                          |       |
| Symptoms                 | 90.92<br>(12.3)<br>n=493 | 68.41<br>(23.5)<br>n=303  | <.001 | 85.21<br>(18.3)<br>n=706 | 61.01<br>(24.2)<br>n=90 | <.001 | 91.68<br>(11.8)<br>n=478 | 68.25<br>(23.0)<br>n=320 | <.001 | 92.63<br>(10.8)<br>n=454  | 68.53<br>(22.7)<br>n=340 | <.001 | 88.84<br>(15.1)<br>n=506   | 71.26<br>(23.8)<br>n=292 | <.001 |
| Physical Functioning     | 91.48<br>(14.8)<br>n=495 | 49.17<br>(27.1)<br>n=305  | <.001 | 81.51<br>(23.6)<br>n=710 | 28.15<br>(21.4)<br>n=88 | <.001 | 91.22<br>(15.4)<br>n=480 | 51.49<br>(28.2)<br>n=320 | <.001 | 87.57<br>(21.6)<br>n=456  | 58.88<br>(29.4)<br>n=341 | <.001 | 84.49<br>(22.9)<br>n=505   | 60.0<br>(31.3)<br>n=295  | <.001 |

|                          |                          |                          |       |                          |                         |       |                          |                          |       |                          |                          |       |                          |                          |       |
|--------------------------|--------------------------|--------------------------|-------|--------------------------|-------------------------|-------|--------------------------|--------------------------|-------|--------------------------|--------------------------|-------|--------------------------|--------------------------|-------|
| Psychosocial Functioning | 87.69<br>(14.1)<br>n=499 | 59.32<br>(24.5)<br>n=311 | <.001 | 81.13<br>(19.7)<br>n=716 | 44.11<br>(22.5)<br>n=93 | <.001 | 88.80<br>(12.3)<br>n=487 | 58.7<br>(24.4)<br>n=324  | <.001 | 87.59<br>(14.8)<br>n=464 | 62.07<br>(24.9)<br>n=344 | <.001 | 87.7<br>(14.2)<br>n=511  | 58.29<br>(23.9)<br>n=301 | <.001 |
| Cognitive Functioning    | 90.65<br>(14.0)<br>n=498 | 68.05<br>(26.5)<br>n=309 | <.001 | 85.38<br>(19.3)<br>n=714 | 56.67<br>(28.9)<br>n=92 | <.001 | 91.02<br>(13.4)<br>n=486 | 68.26<br>(26.6)<br>n=322 | <.001 | 89.54<br>(15.7)<br>n=463 | 71.64<br>(26.4)<br>n=342 | <.001 | 91.15<br>(12.7)<br>n=509 | 66.60<br>(26.7)<br>n=300 | <.001 |
| Adverse Effects          | 98.22<br>(5.1)<br>n=498  | 92.89<br>14.4()<br>n=305 | <.001 | 97.03<br>(8.5)<br>n=713  | 89.60<br>(16.7)<br>n=90 | <.001 | 97.88<br>(7.2)<br>n=483  | 93.49<br>(13.2)<br>n=321 | <.001 | 98.18<br>(5.4)<br>n=462  | 93.25<br>(14.0)<br>n=339 | <.001 | 97.23<br>(8.8)<br>n=508  | 94.18<br>(12.1)<br>n=297 | <.001 |
| Satisfaction             | 87.33<br>(13.9)<br>n=499 | 73.12<br>(22.6)<br>n=313 | <.001 | 83.72<br>(17.4)<br>n=717 | 67.85<br>(24.1)<br>n=93 | <.001 | 88.28<br>(13.2)<br>n=488 | 72.23<br>(22.2)<br>n=325 | <.001 | 88.30<br>(13.6)<br>n=465 | 73.23<br>(13.6)<br>n=345 | <.001 | 86.33<br>(15.4)<br>n=512 | 74.17<br>(22.0)<br>n=302 | <.001 |

Note: higher scores on CROQv2 indicate better functioning.
